# Supplementary material for: Microscopical and elemental FESEM and Phenom ProX-SEM-EDS analysis of osteocyte- and blood vessel-like microstructures obtained from fossil vertebrates of the Eocene Messel Pit, Germany
Source: PubMed Central journal article supplement (PMC4727973; doi:10.7717/peerj.1618), 2016-01-21
Supplement: peerj-04-1618-s002.pdf [file peerj-04-1618-s002.pdf]

## Supplementary information 2

Elemental analyses of OBvF-like microstructures of *Neochelys franzeni* SMF ME 1091 conducted using a Phenom ProX desktop scanning electron microscope (LOT-QuantumDesign) equipped with a thermionic CeB6 source and a high sensitivity multi-mode backscatter electron (BSE) detector, 0.15 kV EHT (primary-beam energy), also at the Geosciences Department, Goethe Universität, Frankfurt, Germany.

**“Osteocyte-like microstructure” 01** (5 spots marked with cross and number)

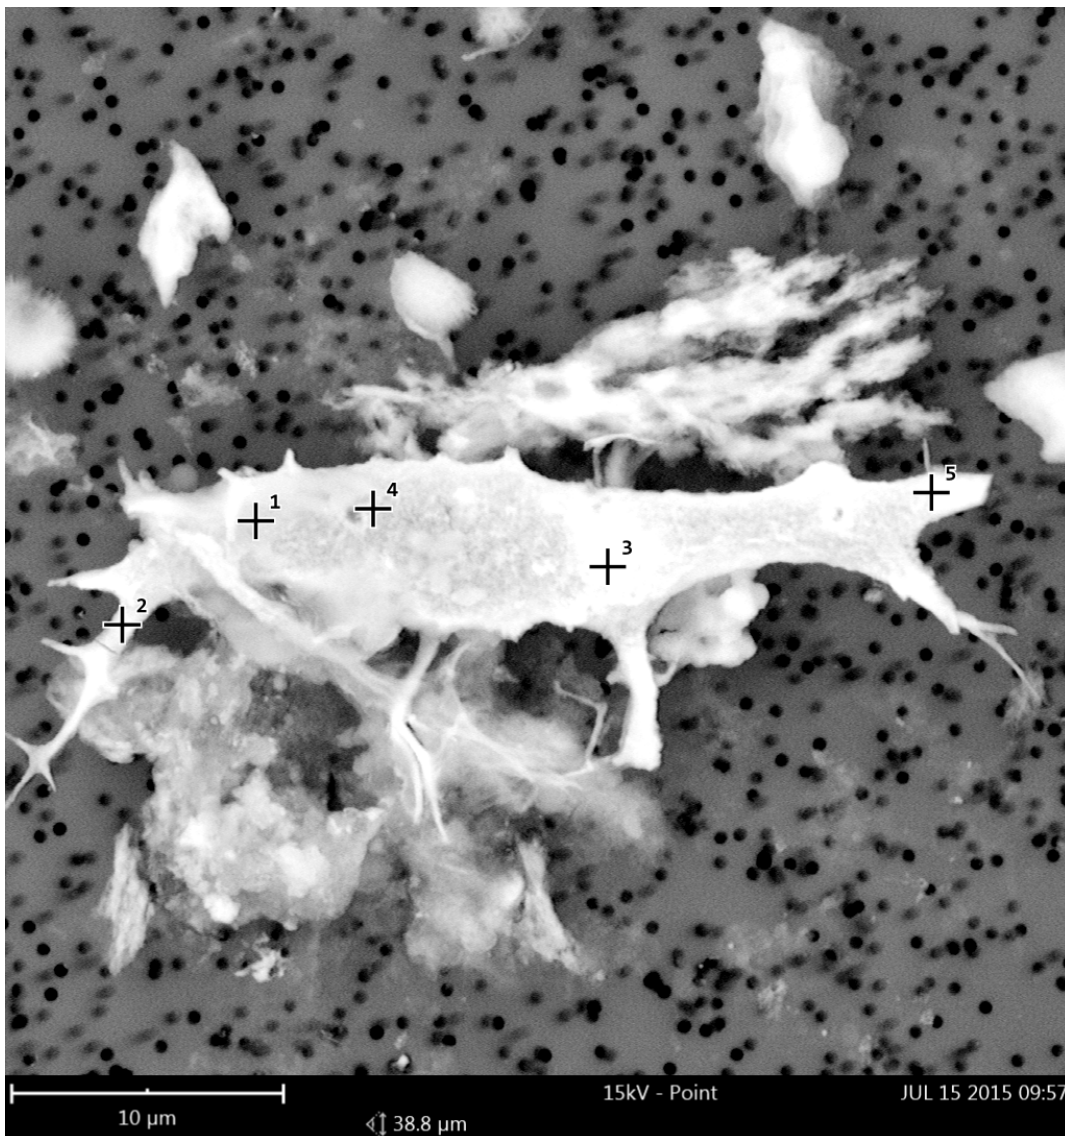

### 1. spot

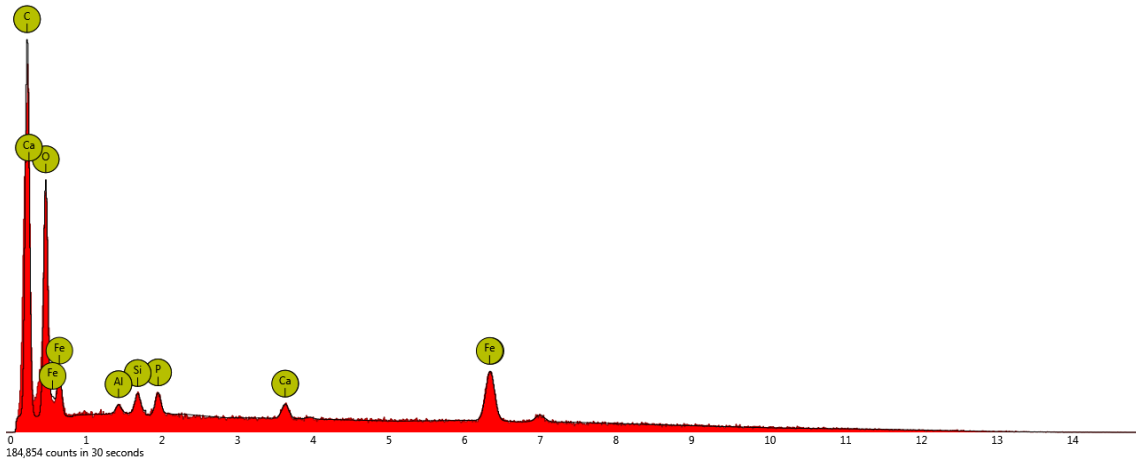

Disabled elements: B

| Element Number | Element Symbol | Element Name | Atomic Concentration | Error |
|----------------|----------------|--------------|----------------------|-------|
| 6              | C              | Carbon       | 23.7                 | 2.1   |
| 8              | O              | Oxygen       | 64.6                 | 0.0   |
| 26             | Fe             | Iron         | 7.7                  | 0.1   |
| 15             | P              | Phosphorus   | 1.3                  | 0.2   |
| 14             | Si             | Silicon      | 1.1                  | 0.2   |
| 20             | Ca             | Calcium      | 0.9                  | 0.3   |
| 13             | Al             | Aluminium    | 0.6                  | 0.1   |

### 2. spot

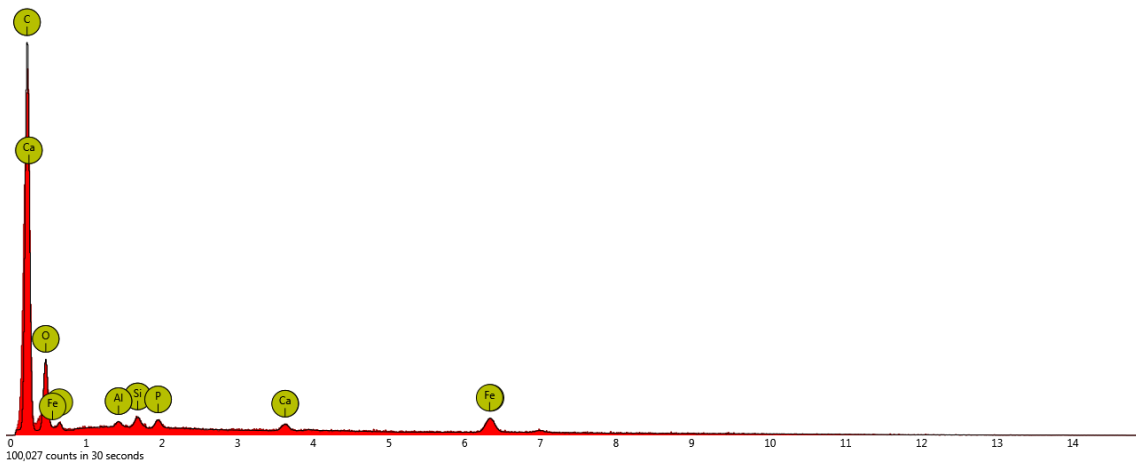

Disabled elements: B

| Element Number | Element Symbol | Element Name | Atomic Concentration | Error |
|----------------|----------------|--------------|----------------------|-------|
| 6              | C              | Carbon       | 41.5                 | 1.6   |
| 8              | O              | Oxygen       | 50.8                 | 0.0   |
| 26             | Fe             | Iron         | 4.3                  | 0.1   |
| 14             | Si             | Silicon      | 1.0                  | 0.4   |

|    |    |            |     |     |
|----|----|------------|-----|-----|
| 15 | P  | Phosphorus | 0.9 | 0.3 |
| 20 | Ca | Calcium    | 0.8 | 0.4 |
| 13 | Al | Aluminium  | 0.7 | 0.1 |

### 3. spot

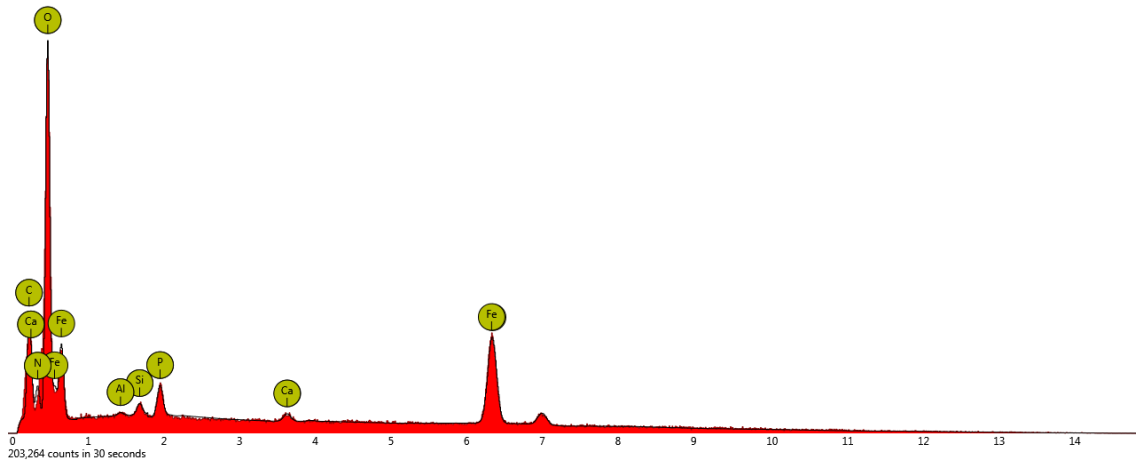

Disabled elements: Te

| Element Number | Element Symbol | Element Name | Atomic Concentration | Error |
|----------------|----------------|--------------|----------------------|-------|
| 8              | O              | Oxygen       | 73.8                 | 0.0   |
| 26             | Fe             | Iron         | 11.4                 | 0.1   |
| 6              | C              | Carbon       | 6.2                  | 1.2   |
| 15             | P              | Phosphorus   | 1.6                  | 0.1   |
| 7              | N              | Nitrogen     | 5.8                  | 1.4   |
| 14             | Si             | Silicon      | 0.6                  | 0.4   |
| 20             | Ca             | Calcium      | 0.4                  | 1.0   |
| 13             | Al             | Aluminium    | 0.2                  | 0.4   |

### 4. spot

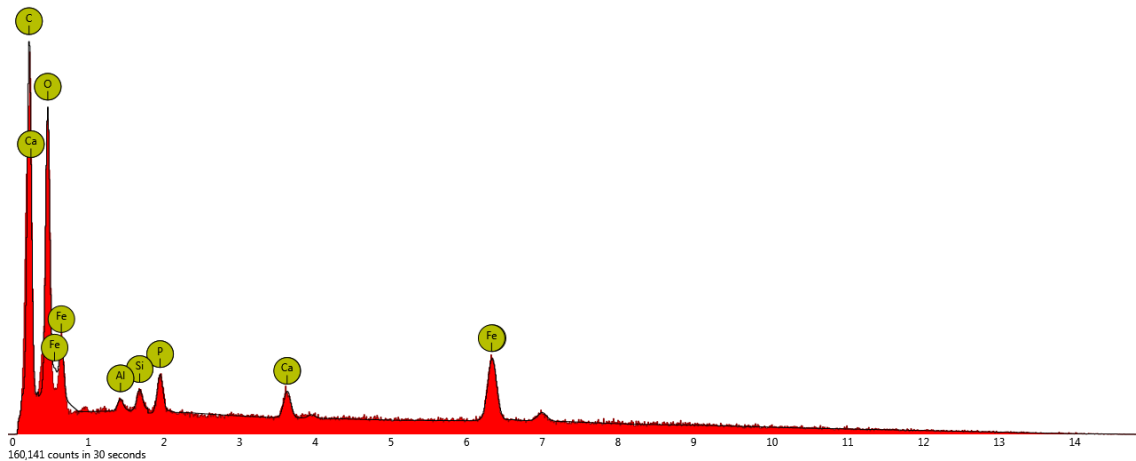

| Element Number | Element Symbol | Element Name | Atomic Concentration | Error |
|----------------|----------------|--------------|----------------------|-------|
| 6              | C              | Carbon       | 20.1                 | 1.8   |

|    |    |            |      |     |
|----|----|------------|------|-----|
| 8  | O  | Oxygen     | 66.5 | 0.0 |
| 26 | Fe | Iron       | 8.2  | 0.1 |
| 15 | P  | Phosphorus | 2.0  | 0.2 |
| 20 | Ca | Calcium    | 1.5  | 0.4 |
| 14 | Si | Silicon    | 1.0  | 0.4 |
| 13 | Al | Aluminium  | 0.8  | 0.3 |

**5. spot**

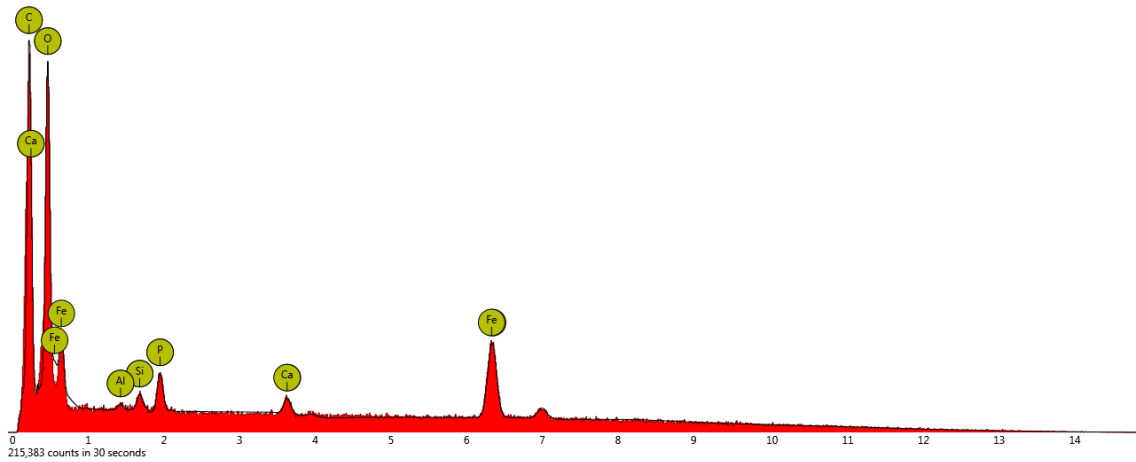

Disabled elements: Te

| Element Number | Element Symbol | Element Name | Atomic Concentration | Error |
|----------------|----------------|--------------|----------------------|-------|
| 6              | C              | Carbon       | 19.3                 | 1.0   |
| 8              | O              | Oxygen       | 67.3                 | 0.0   |
| 26             | Fe             | Iron         | 9.6                  | 0.1   |
| 15             | P              | Phosphorus   | 2.0                  | 0.1   |
| 20             | Ca             | Calcium      | 0.9                  | 0.5   |
| 14             | Si             | Silicon      | 0.7                  | 0.3   |
| 13             | Al             | Aluminium    | 0.4                  | 0.6   |

**“Osteocyte-like microstructure” 02** (3 spots marked with cross and number)

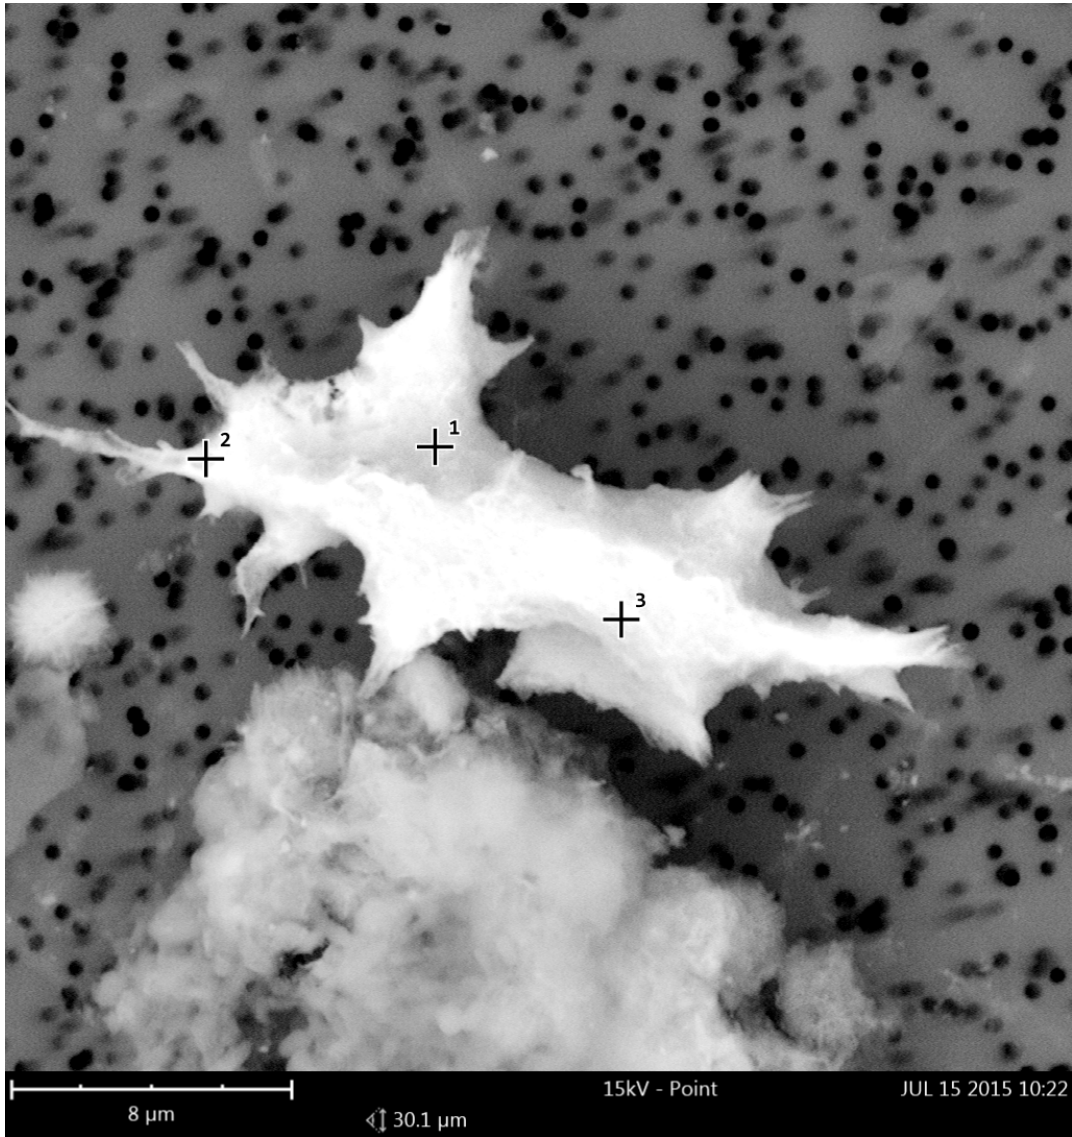

### 1. spot

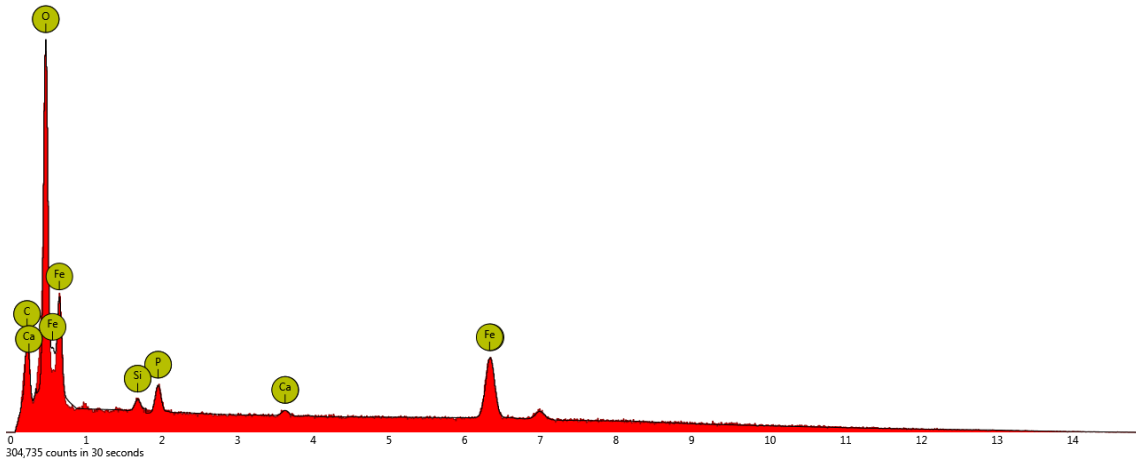

| Element Number | Element Symbol | Element Name | Atomic Concentration | Error |
|----------------|----------------|--------------|----------------------|-------|
| 8              | O              | Oxygen       | 79.7                 | 0.0   |
| 26             | Fe             | Iron         | 11.2                 | 0.1   |
| 6              | C              | Carbon       | 5.7                  | 1.1   |
| 15             | P              | Phosphorus   | 2.1                  | 0.1   |
| 14             | Si             | Silicon      | 0.8                  | 0.7   |
| 20             | Ca             | Calcium      | 0.4                  | 0.6   |

### 2. spot

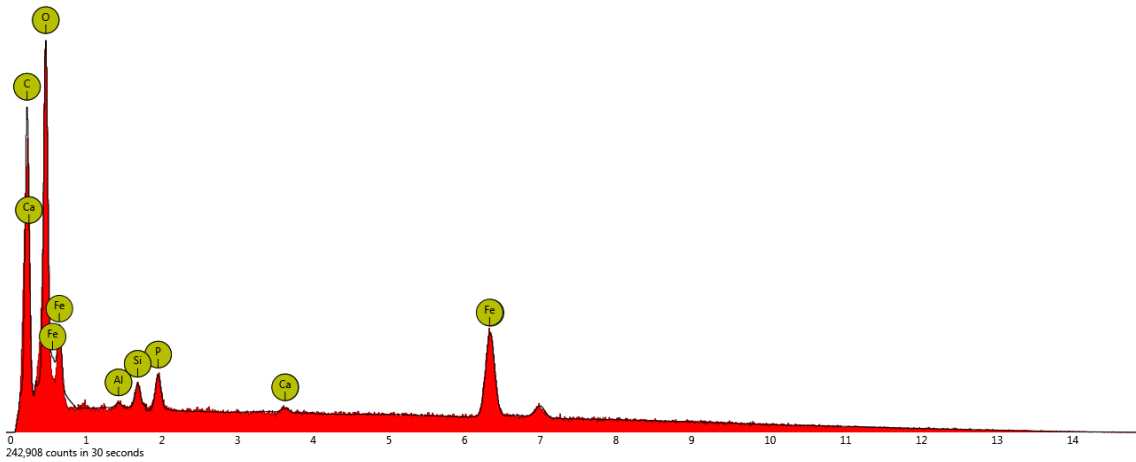

| Element Number | Element Symbol | Element Name | Atomic Concentration | Error |
|----------------|----------------|--------------|----------------------|-------|
| 8              | O              | Oxygen       | 68.8                 | 0.0   |
| 6              | C              | Carbon       | 16.2                 | 1.3   |
| 26             | Fe             | Iron         | 11.2                 | 0.0   |
| 15             | P              | Phosphorus   | 2.0                  | 0.1   |
| 14             | Si             | Silicon      | 1.2                  | 0.3   |
| 20             | Ca             | Calcium      | 0.3                  | 0.8   |

13

Al

Aluminium

0.3

0.4

### 3. spot

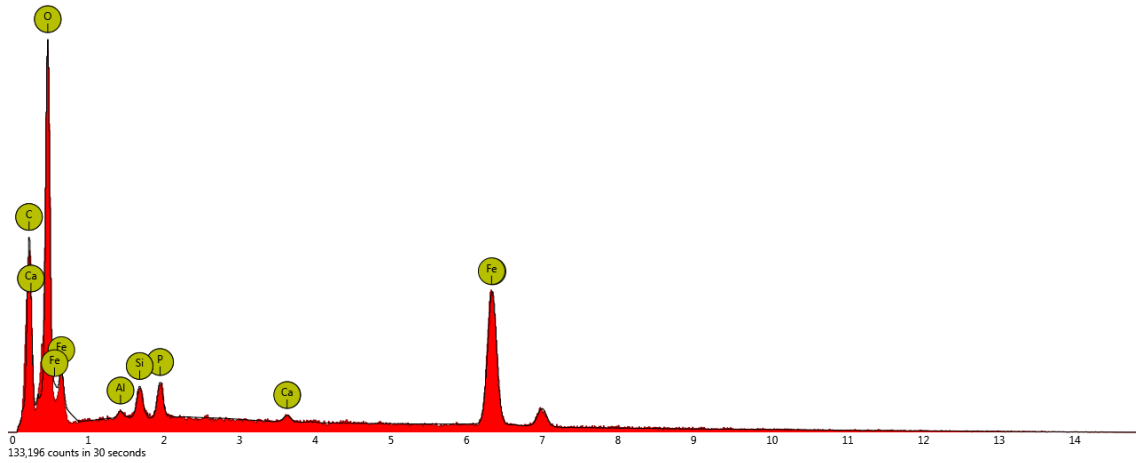

Disabled elements: B

| Element Number | Element Symbol | Element Name | Atomic Concentration | Error |
|----------------|----------------|--------------|----------------------|-------|
| 8              | O              | Oxygen       | 67.2                 | 0.0   |
| 26             | Fe             | Iron         | 17.3                 | 0.1   |
| 6              | C              | Carbon       | 11.0                 | 1.3   |
| 15             | P              | Phosphorus   | 2.0                  | 0.3   |
| 14             | Si             | Silicon      | 1.6                  | 0.3   |
| 20             | Ca             | Calcium      | 0.4                  | 0.6   |
| 13             | Al             | Aluminium    | 0.5                  | 0.4   |

**“blood vessel-like microstructure” 01** (3 spots marked with cross and number)

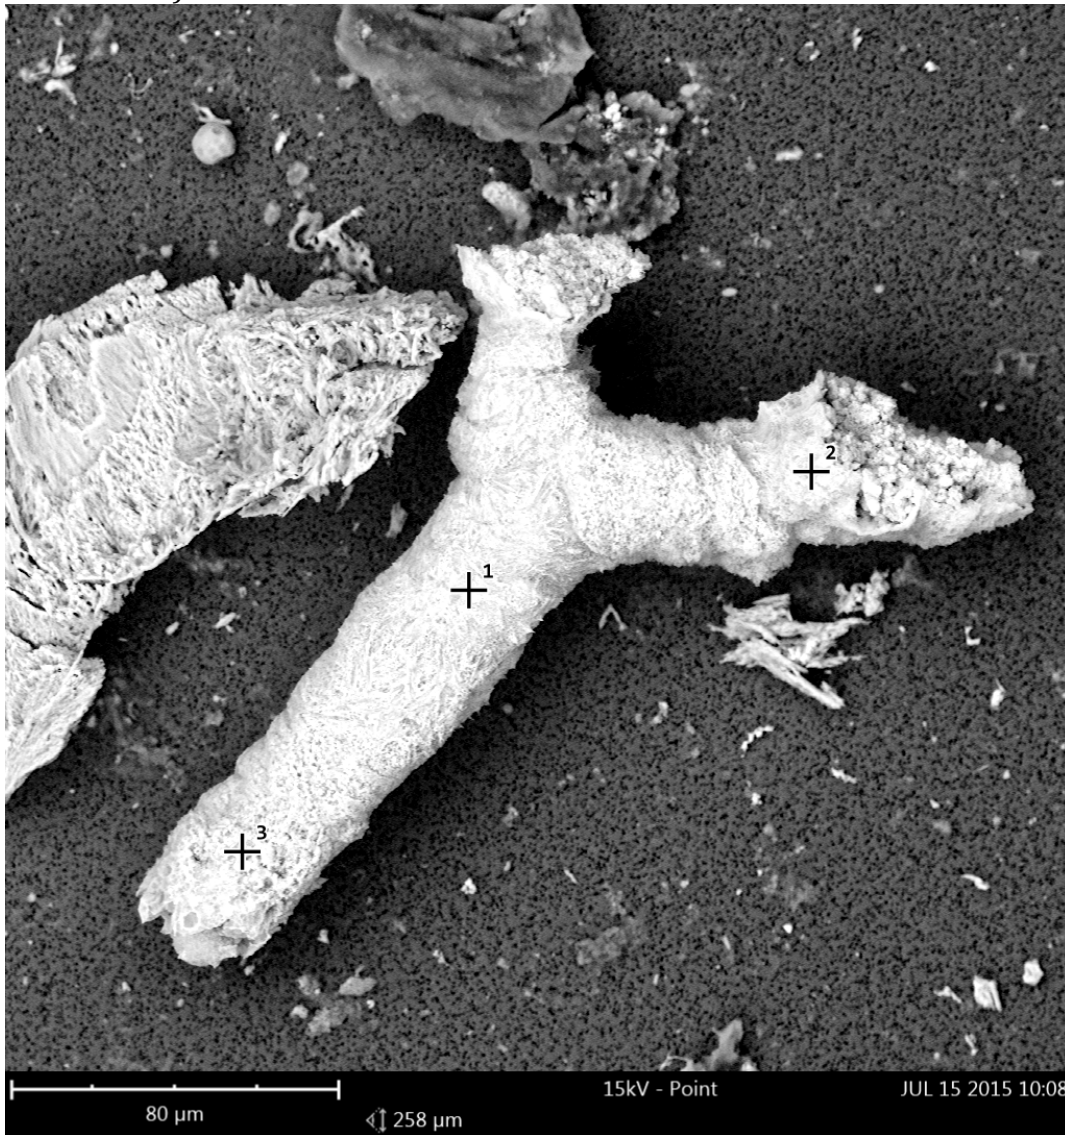



### 1. spot

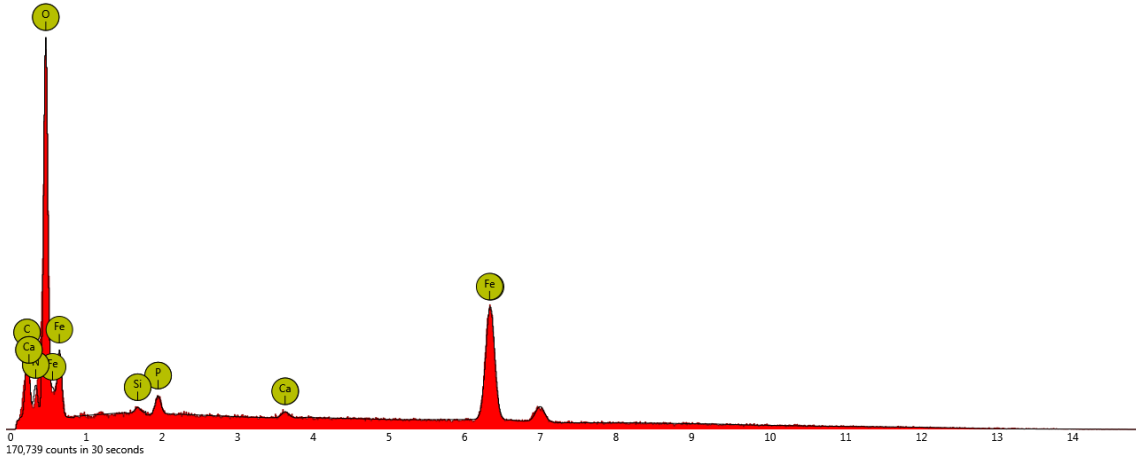

| Element Number | Element Symbol | Element Name | Atomic Concentration | Error |
|----------------|----------------|--------------|----------------------|-------|
| 8              | O              | Oxygen       | 73.1                 | 0.0   |
| 26             | Fe             | Iron         | 15.6                 | 0.0   |
| 6              | C              | Carbon       | 4.1                  | 1.1   |
| 7              | N              | Nitrogen     | 5.5                  | 1.4   |
| 15             | P              | Phosphorus   | 1.1                  | 0.3   |
| 20             | Ca             | Calcium      | 0.4                  | 1.0   |
| 14             | Si             | Silicon      | 0.3                  | 0.8   |

### 2. spot

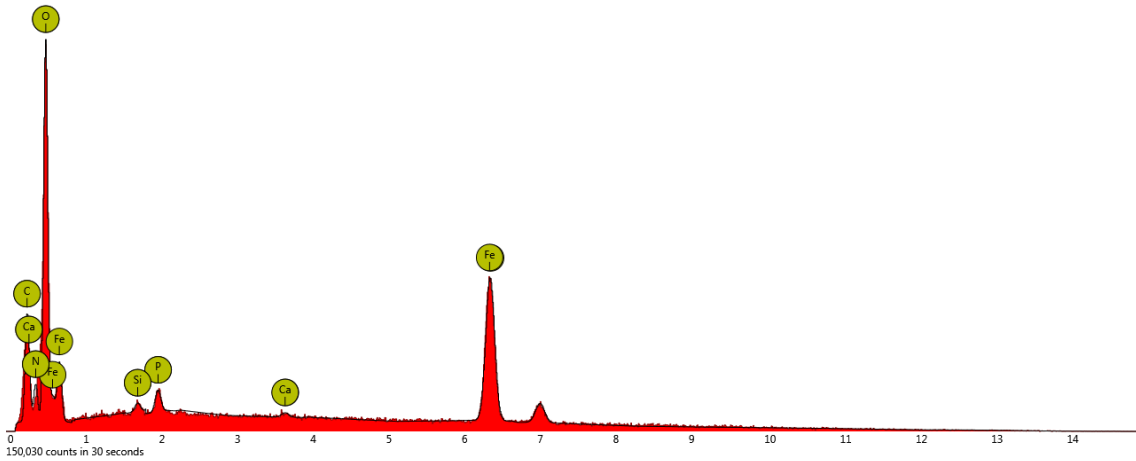

Disabled elements: B

| Element Number | Element Symbol | Element Name | Atomic Concentration | Error |
|----------------|----------------|--------------|----------------------|-------|
| 8              | O              | Oxygen       | 68.7                 | 0.0   |
| 26             | Fe             | Iron         | 17.5                 | 0.1   |
| 6              | C              | Carbon       | 6.0                  | 2.2   |

|    |    |            |     |     |
|----|----|------------|-----|-----|
| 7  | N  | Nitrogen   | 6.0 | 1.5 |
| 15 | P  | Phosphorus | 1.2 | 0.2 |
| 14 | Si | Silicon    | 0.4 | 0.7 |
| 20 | Ca | Calcium    | 0.2 | 1.2 |

### 3. spot

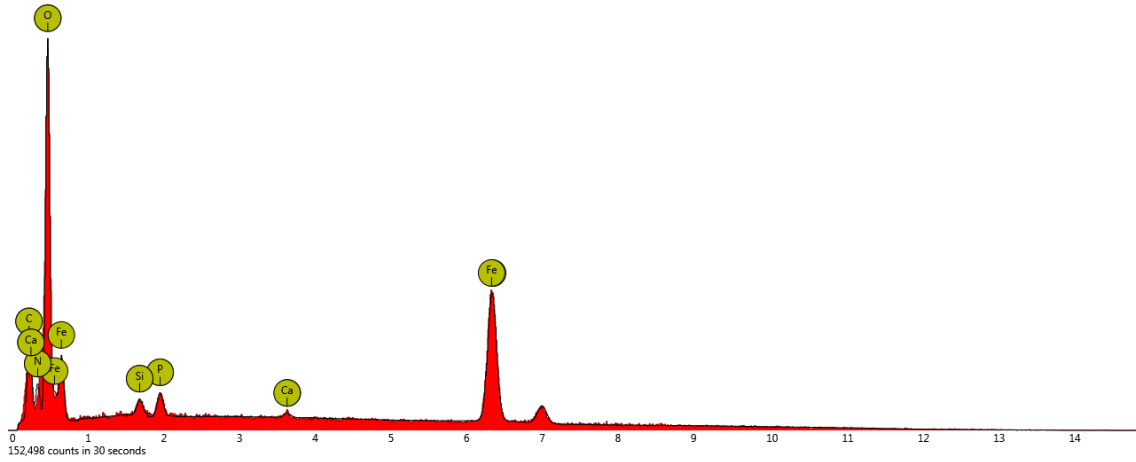

| Element Number | Element Symbol | Element Name | Atomic Concentration | Error |
|----------------|----------------|--------------|----------------------|-------|
| 8              | O              | Oxygen       | 70.6                 | 0.0   |
| 26             | Fe             | Iron         | 16.3                 | 0.1   |
| 6              | C              | Carbon       | 4.7                  | 1.1   |
| 7              | N              | Nitrogen     | 6.0                  | 1.5   |
| 15             | P              | Phosphorus   | 1.3                  | 0.8   |
| 14             | Si             | Silicon      | 0.8                  | 0.9   |
| 20             | Ca             | Calcium      | 0.2                  | 0.7   |

**“collagen fibril-like microstructure” 01** (3 spots marked with cross and number)

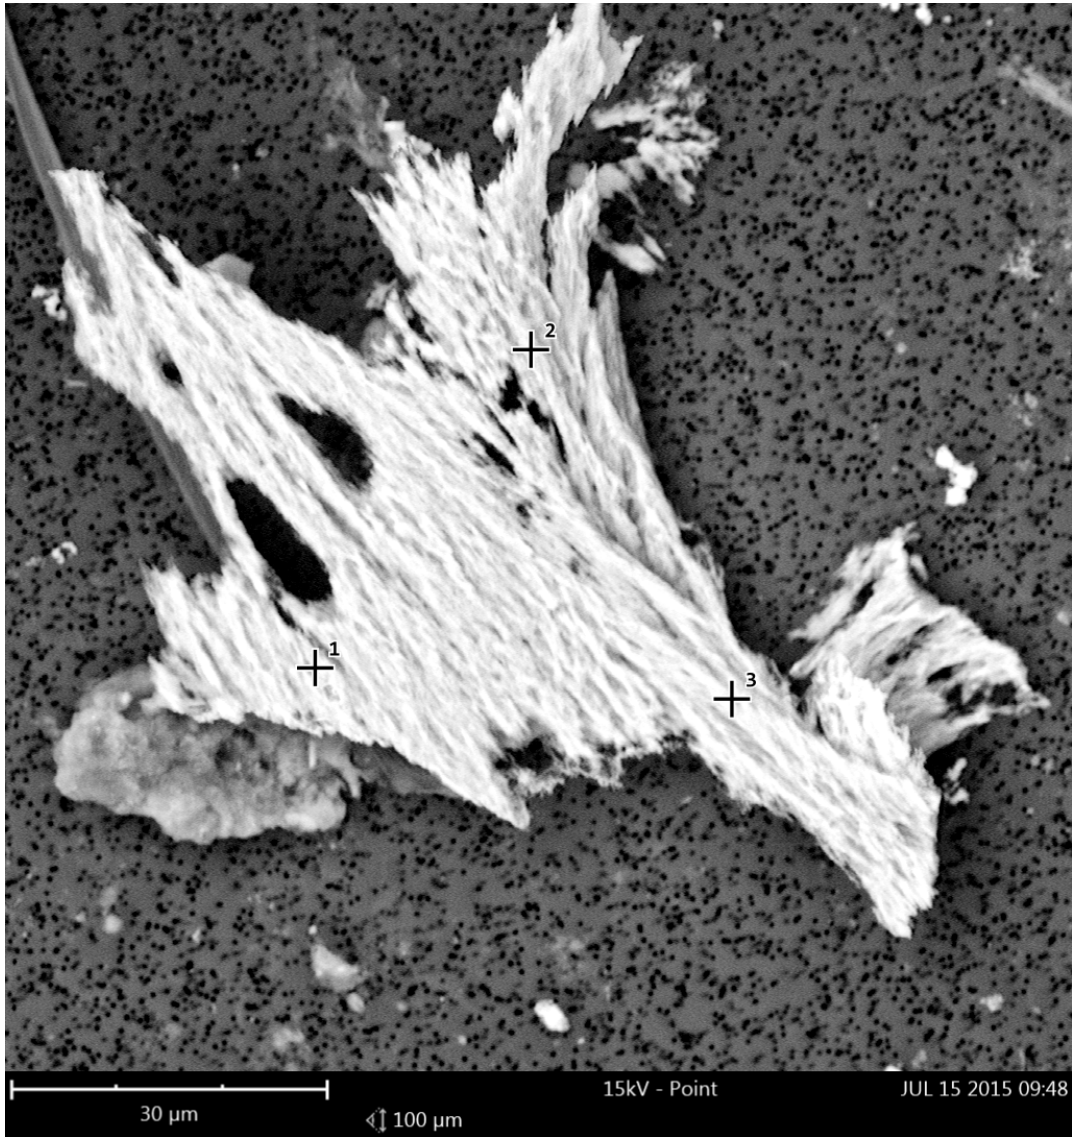

### 1. spot

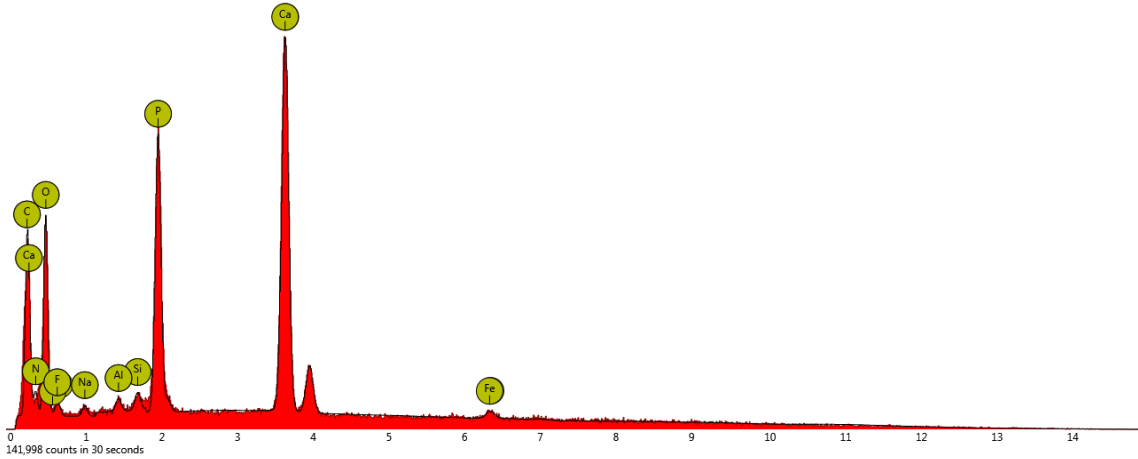

| Element Number | Element Symbol | Element Name | Atomic Concentration | Error |
|----------------|----------------|--------------|----------------------|-------|
| 20             | Ca             | Calcium      | 12.8                 | 0.0   |
| 15             | P              | Phosphorus   | 7.7                  | 0.1   |
| 8              | O              | Oxygen       | 58.0                 | 0.0   |
| 6              | C              | Carbon       | 7.5                  | 1.6   |
| 7              | N              | Nitrogen     | 7.6                  | 3.6   |
| 14             | Si             | Silicon      | 0.4                  | 8.0   |
| 13             | Al             | Aluminium    | 0.4                  | 0.3   |
| 26             | Fe             | Iron         | 0.6                  | 0.6   |
| 9              | F              | Fluorine     | 3.9                  | 0.3   |
| 11             | Na             | Sodium       | 1.1                  | 0.9   |

### 2. spot

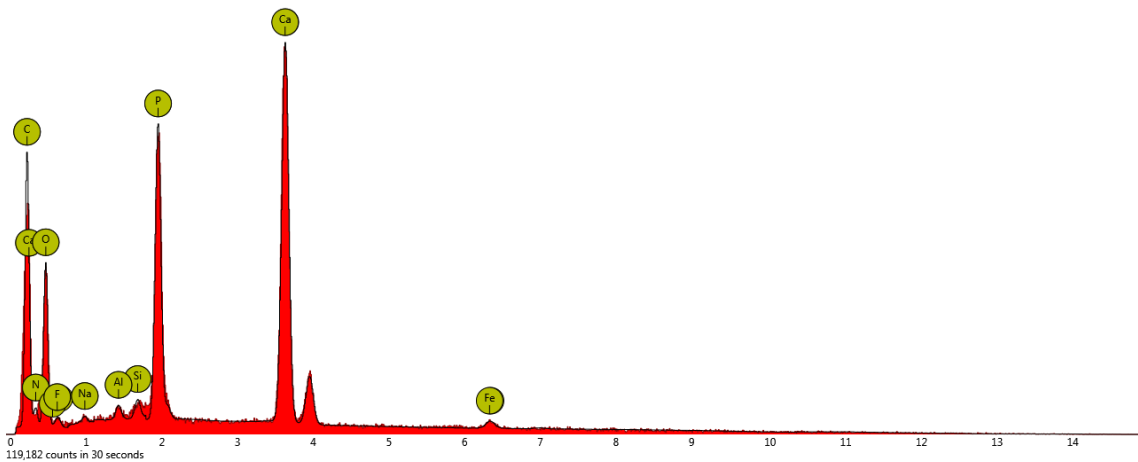

Disabled elements: B

| Element Number | Element Symbol | Element Name | Atomic Concentration | Error |
|----------------|----------------|--------------|----------------------|-------|
| 20             | Ca             | Calcium      | 13.9                 | 0.0   |
| 15             | P              | Phosphorus   | 8.7                  | 0.1   |
| 6              | C              | Carbon       | 11.1                 | 2.6   |
| 8              | O              | Oxygen       | 54.1                 | 0.1   |
| 14             | Si             | Silicon      | 0.5                  | 15.3  |
| 7              | N              | Nitrogen     | 6.8                  | 3.8   |
| 13             | Al             | Aluminium    | 0.5                  | 0.5   |
| 26             | Fe             | Iron         | 0.6                  | 0.5   |
| 9              | F              | Fluorine     | 3.1                  | 1.7   |
| 11             | Na             | Sodium       | 0.6                  | 0.5   |

### 3. spot

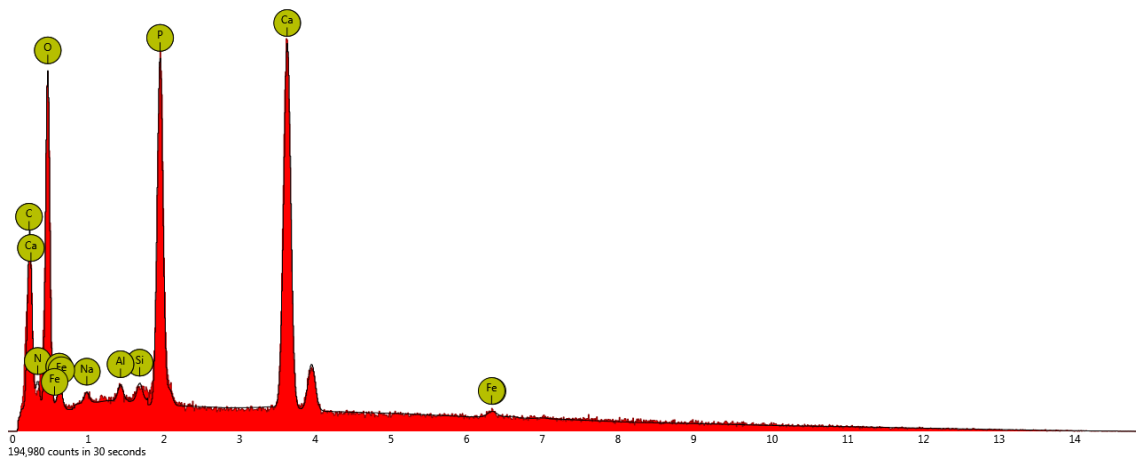

| Element Number | Element Symbol | Element Name | Atomic Concentration | Error |
|----------------|----------------|--------------|----------------------|-------|
| 20             | Ca             | Calcium      | 9.7                  | 0.1   |
| 15             | P              | Phosphorus   | 7.4                  | 0.1   |
| 8              | O              | Oxygen       | 64.5                 | 0.0   |
| 6              | C              | Carbon       | 5.6                  | 1.3   |
| 7              | N              | Nitrogen     | 5.8                  | 2.7   |
| 14             | Si             | Silicon      | 0.3                  | 8.4   |
| 9              | F              | Fluorine     | 5.2                  | 0.1   |
| 13             | Al             | Aluminium    | 0.4                  | 0.2   |
| 11             | Na             | Sodium       | 0.8                  | 0.8   |
| 26             | Fe             | Iron         | 0.3                  | 0.7   |

**“collagen fibril-like microstructure” 02** (3 spots marked with cross and number)

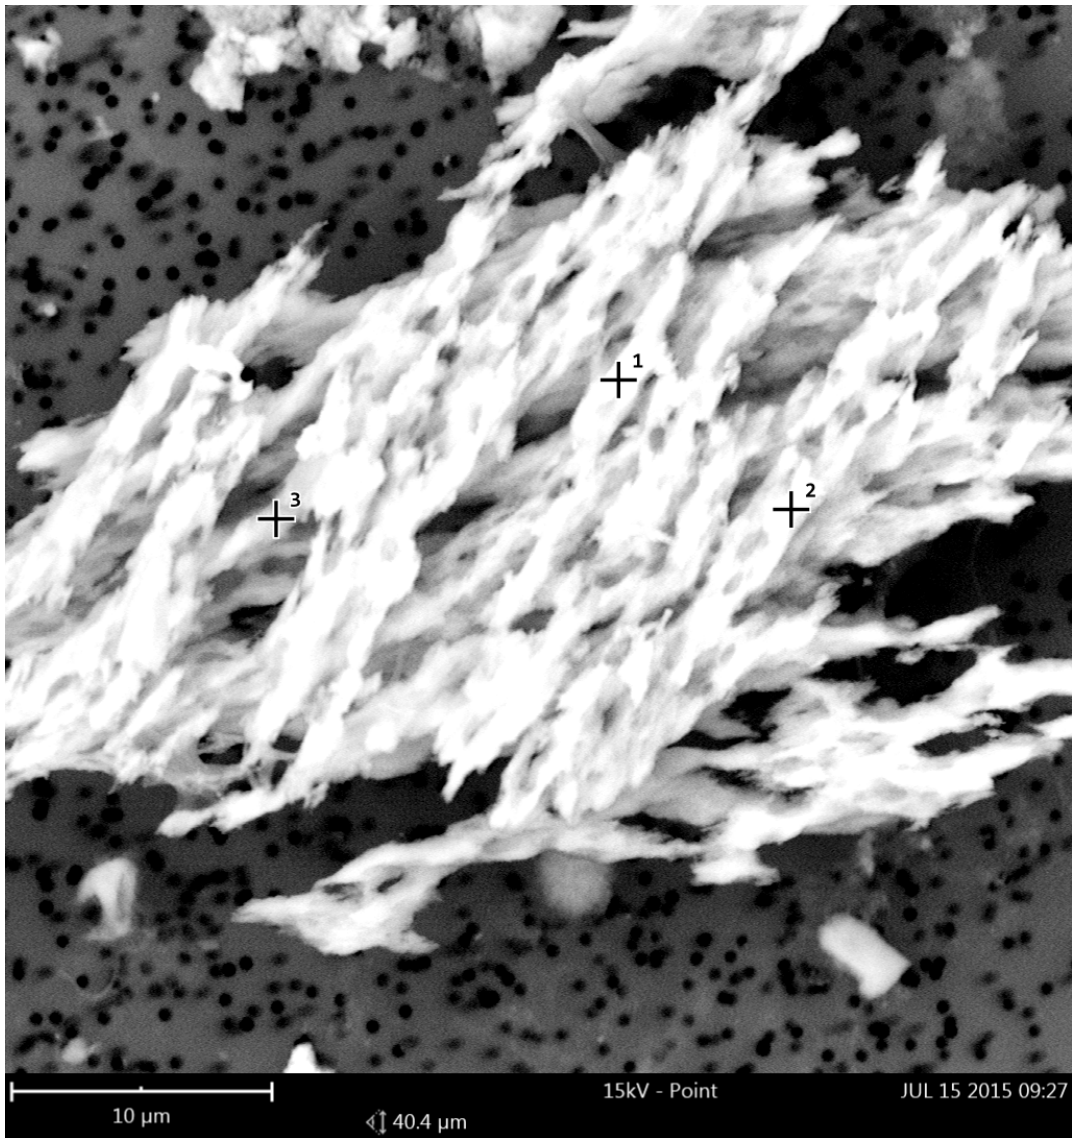

**1. spot**

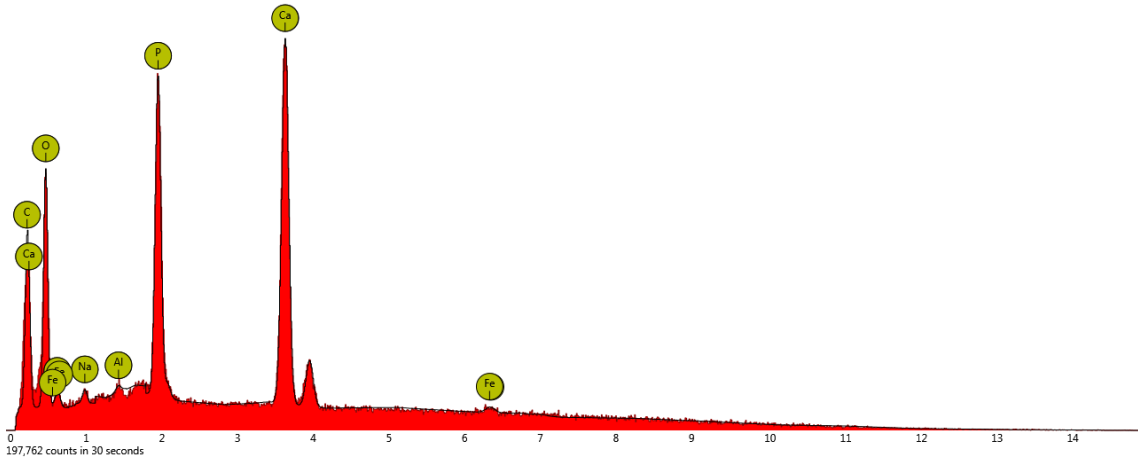

Disabled elements: N

| Element Number | Element Symbol | Element Name | Atomic Concentration | Error |
|----------------|----------------|--------------|----------------------|-------|
| 20             | Ca             | Calcium      | 12.8                 | 0.0   |
| 15             | P              | Phosphorus   | 9.0                  | 0.0   |
| 8              | O              | Oxygen       | 63.7                 | 0.0   |
| 6              | C              | Carbon       | 7.6                  | 2.1   |
| 9              | F              | Fluorine     | 4.8                  | 1.6   |
| 11             | Na             | Sodium       | 1.5                  | 0.8   |
| 26             | Fe             | Iron         | 0.4                  | 1.5   |
| 13             | Al             | Aluminium    | 0.2                  | 0.9   |

**2. spot**

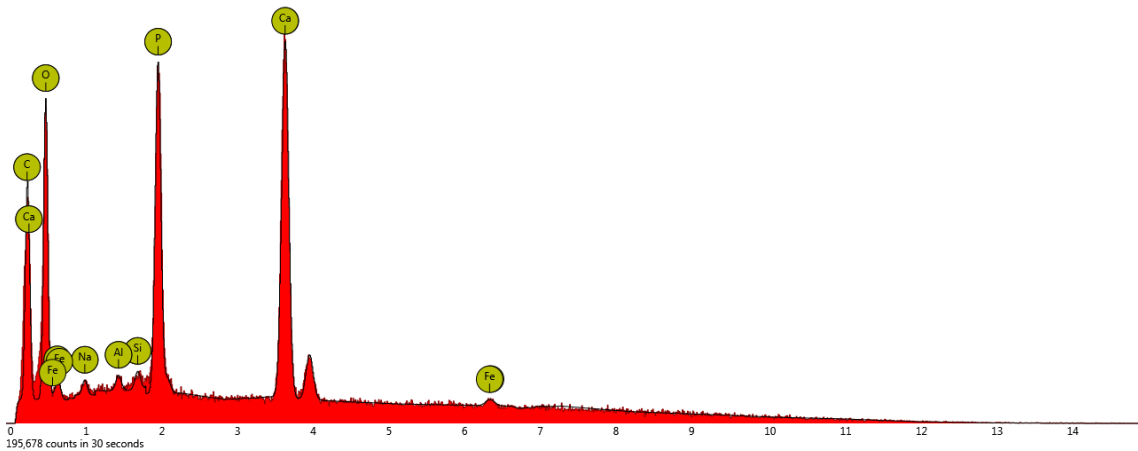

Disabled elements: N, Sr, Y

| Element Number | Element Symbol | Element Name | Atomic Concentration | Error |
|----------------|----------------|--------------|----------------------|-------|
| 20             | Ca             | Calcium      | 10.9                 | 0.1   |
| 15             | P              | Phosphorus   | 8.2                  | 0.1   |
| 8              | O              | Oxygen       | 64.8                 | 0.0   |
| 6              | C              | Carbon       | 8.1                  | 2.0   |
| 14             | Si             | Silicon      | 0.4                  | 8.6   |
| 9              | F              | Fluorine     | 5.3                  | 0.6   |
| 13             | Al             | Aluminium    | 0.5                  | 0.3   |
| 11             | Na             | Sodium       | 1.4                  | 1.6   |
| 26             | Fe             | Iron         | 0.5                  | 0.5   |

### 3. spot

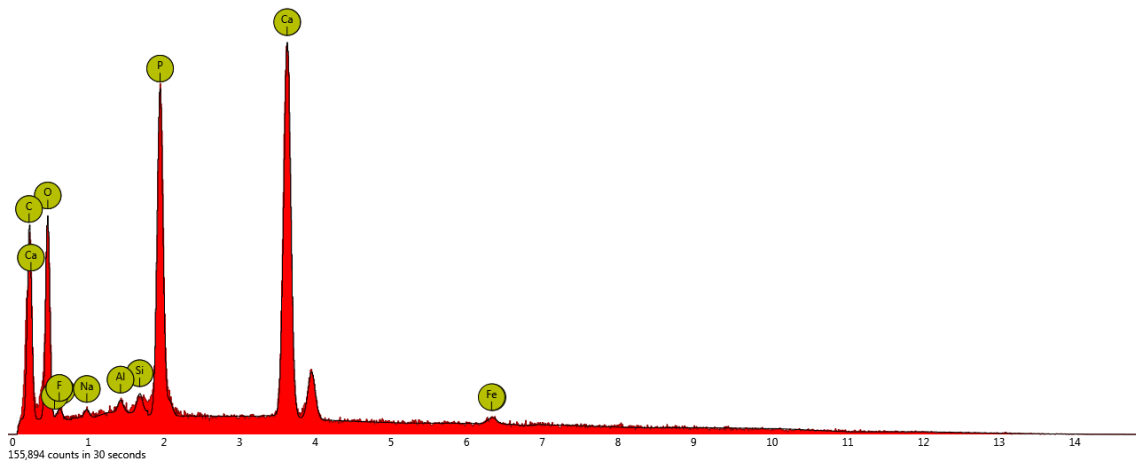

Disabled elements: B

| Element Number | Element Symbol | Element Name | Atomic Concentration | Error |
|----------------|----------------|--------------|----------------------|-------|
| 20             | Ca             | Calcium      | 13.9                 | 0.0   |
| 15             | P              | Phosphorus   | 9.8                  | 0.1   |
| 8              | O              | Oxygen       | 61.3                 | 0.0   |
| 6              | C              | Carbon       | 9.2                  | 1.9   |
| 14             | Si             | Silicon      | 0.5                  | 16.4  |
| 13             | Al             | Aluminium    | 0.4                  | 0.5   |
| 26             | Fe             | Iron         | 0.6                  | 0.8   |
| 9              | F              | Fluorine     | 3.4                  | 1.5   |
| 11             | Na             | Sodium       | 0.9                  | 0.7   |



**Bone matrix 01** (4 spots marked with cross and number)

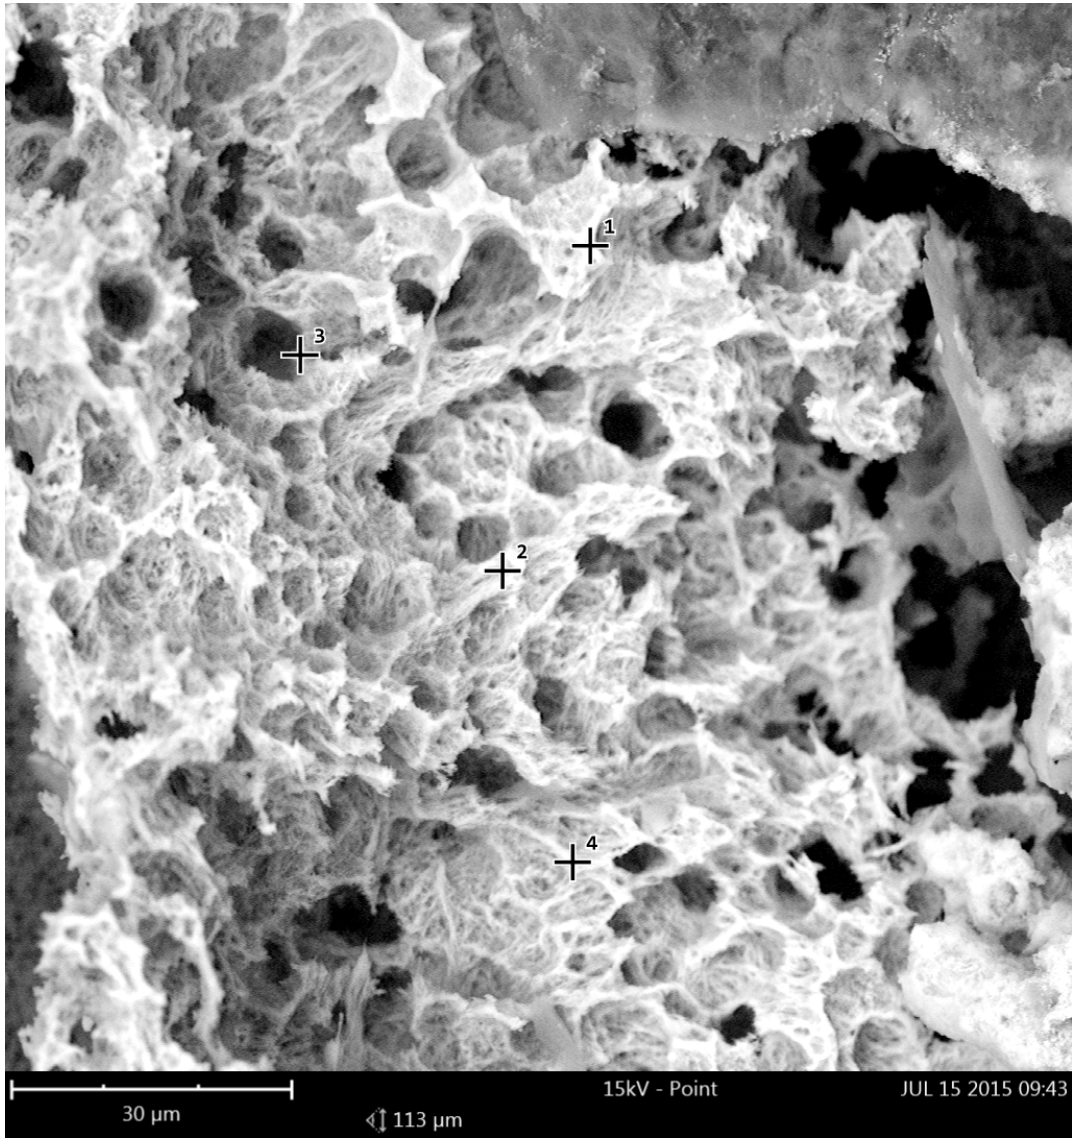

### 1. spot

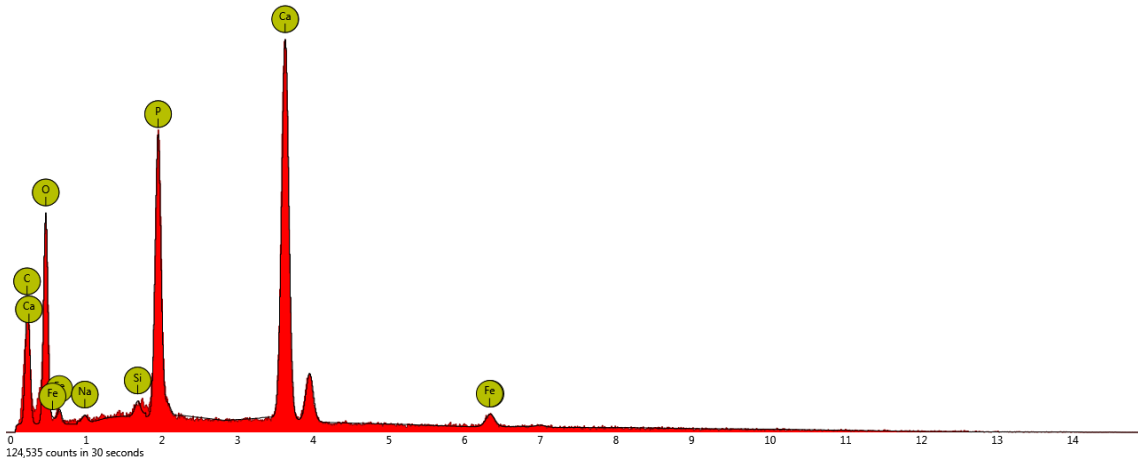

Disabled elements: N

| Element Number | Element Symbol | Element Name | Atomic Concentration | Error |
|----------------|----------------|--------------|----------------------|-------|
| 20             | Ca             | Calcium      | 15.0                 | 0.0   |
| 15             | P              | Phosphorus   | 9.0                  | 0.0   |
| 8              | O              | Oxygen       | 67.5                 | 0.0   |
| 6              | C              | Carbon       | 6.1                  | 1.9   |
| 26             | Fe             | Iron         | 1.2                  | 0.2   |
| 14             | Si             | Silicon      | 0.4                  | 5.2   |
| 11             | Na             | Sodium       | 0.8                  | 2.6   |

### 2. spot

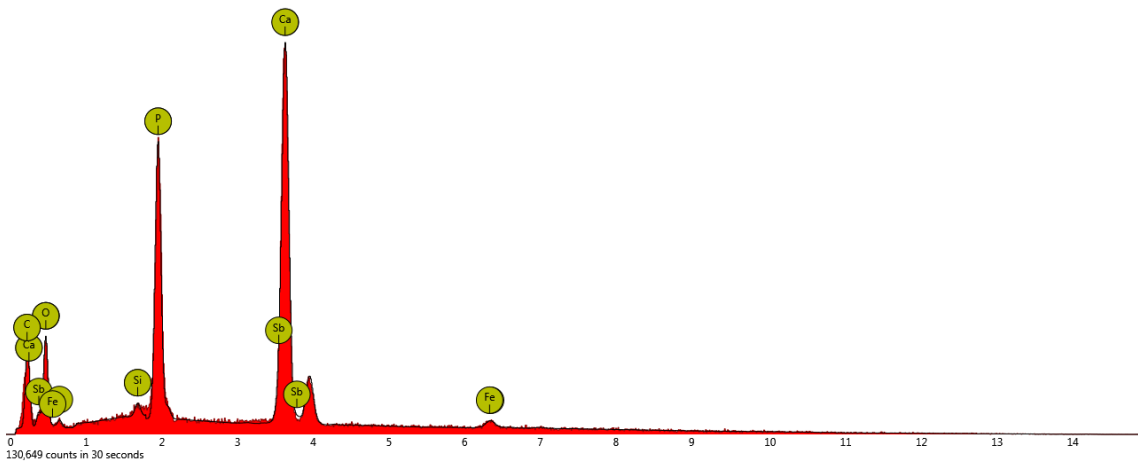

Disabled elements: B

| Element Number | Element Symbol | Element Name | Atomic Concentration | Error |
|----------------|----------------|--------------|----------------------|-------|
| 20             | Ca             | Calcium      | 23.3                 | 0.0   |
| 15             | P              | Phosphorus   | 13.8                 | 0.1   |
| 51             | Sb             | Antimony     | 0.9                  | 0.0   |
| 8              | O              | Oxygen       | 53.7                 | 0.0   |
| 6              | C              | Carbon       | 6.7                  | 1.6   |
| 14             | Si             | Silicon      | 0.6                  | 14.0  |
| 26             | Fe             | Iron         | 1.0                  | 0.5   |

### 3. spot

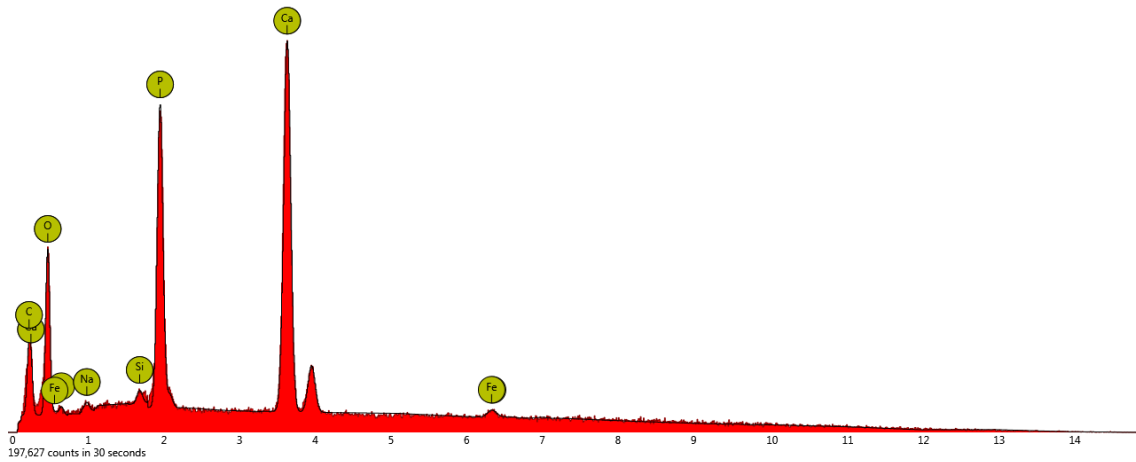

Disabled elements: N

| Element Number | Element Symbol | Element Name | Atomic Concentration | Error |
|----------------|----------------|--------------|----------------------|-------|
| 20             | Ca             | Calcium      | 16.9                 | 0.1   |
| 15             | P              | Phosphorus   | 11.0                 | 0.0   |
| 8              | O              | Oxygen       | 65.0                 | 0.0   |
| 6              | C              | Carbon       | 4.9                  | 1.4   |
| 14             | Si             | Silicon      | 0.4                  | 4.0   |
| 26             | Fe             | Iron         | 0.7                  | 0.7   |
| 11             | Na             | Sodium       | 1.1                  | 1.5   |

### 4. spot

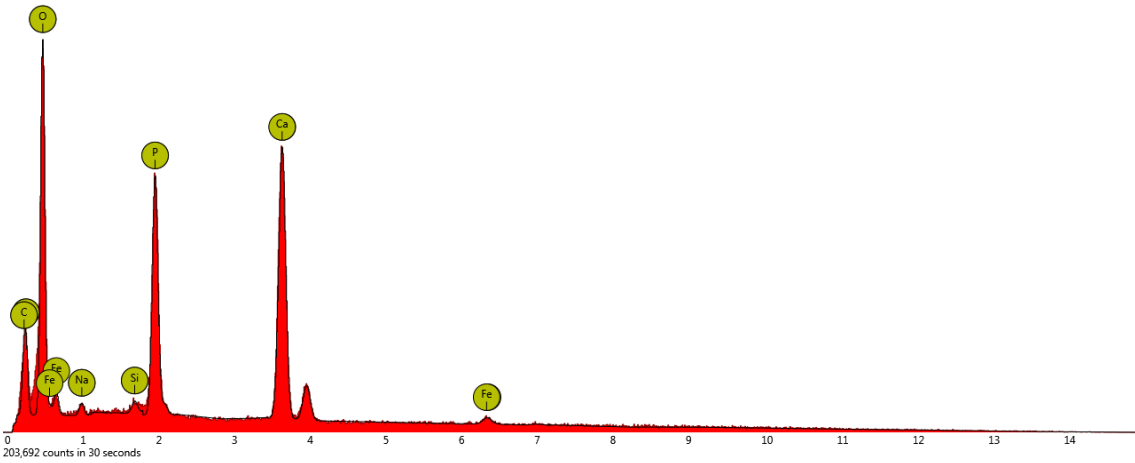

Disabled elements: N

| Element Number | Element Symbol | Element Name | Atomic Concentration | Error |
|----------------|----------------|--------------|----------------------|-------|
| 20             | Ca             | Calcium      | 9.3                  | 0.0   |
| 8              | O              | Oxygen       | 78.5                 | 0.0   |
| 15             | P              | Phosphorus   | 6.7                  | 0.0   |
| 6              | C              | Carbon       | 3.4                  | 1.6   |
| 14             | Si             | Silicon      | 0.3                  | 7.2   |
| 11             | Na             | Sodium       | 1.3                  | 0.6   |
| 26             | Fe             | Iron         | 0.5                  | 0.5   |

**Bone matrix 02** (2 spots marked with cross and number)

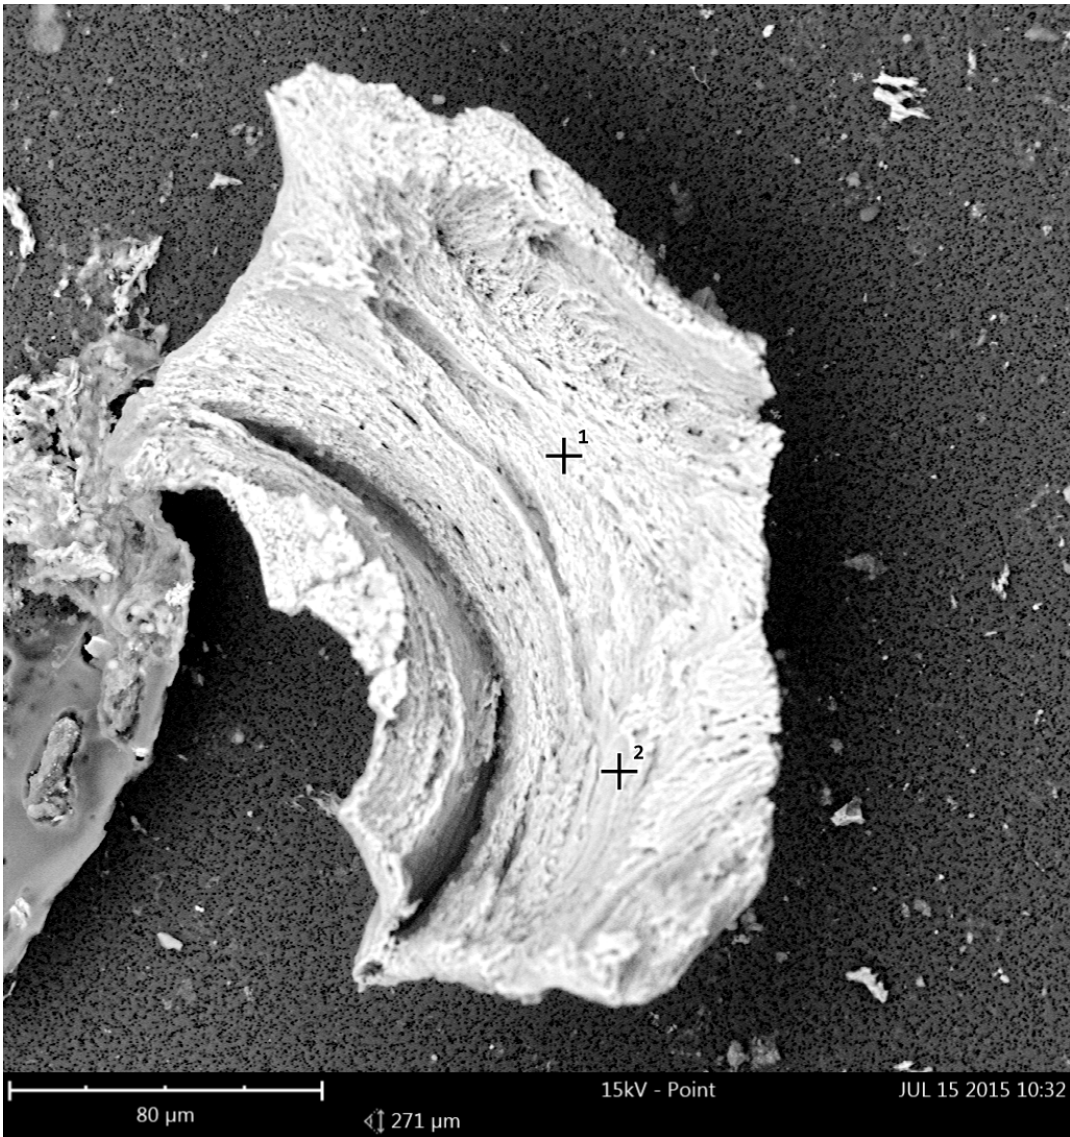

**1. spot**

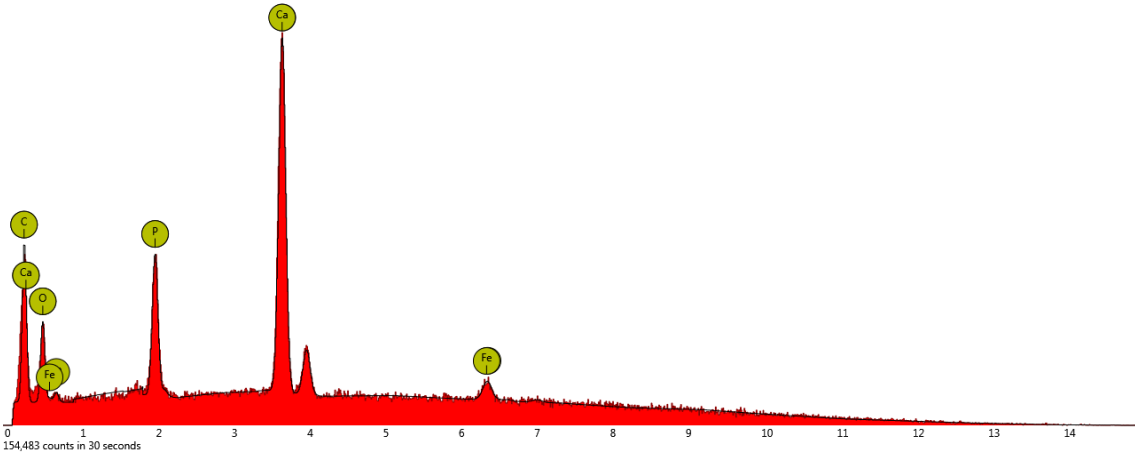

Disabled elements: B

| Element Number | Element Symbol | Element Name | Atomic Concentration | Error |
|----------------|----------------|--------------|----------------------|-------|
| 20             | Ca             | Calcium      | 23.4                 | 0.0   |
| 15             | P              | Phosphorus   | 7.7                  | 0.1   |
| 6              | C              | Carbon       | 11.6                 | 1.1   |
| 8              | O              | Oxygen       | 54.4                 | 0.1   |
| 26             | Fe             | Iron         | 2.9                  | 0.6   |

## 2. spot

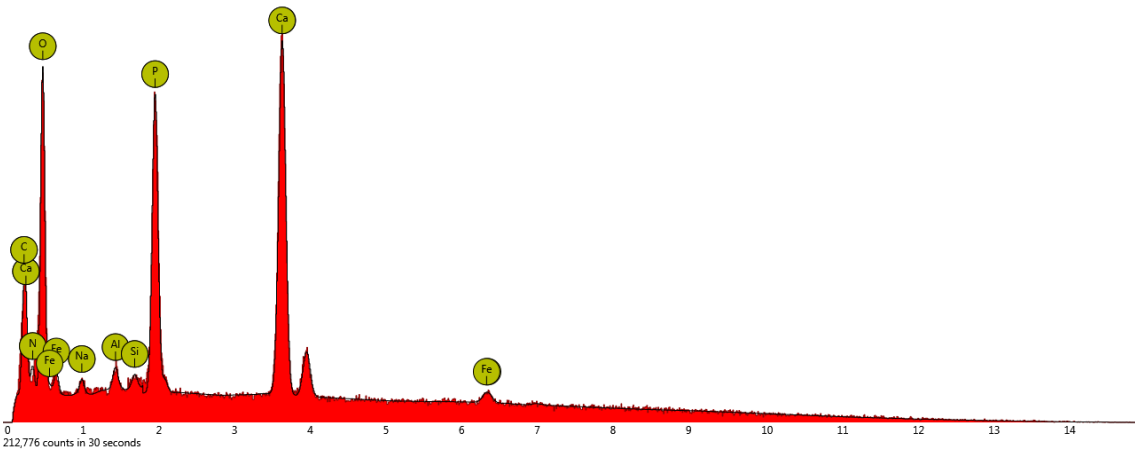

| Element Number | Element Symbol | Element Name | Atomic Concentration | Error |
|----------------|----------------|--------------|----------------------|-------|
| 20             | Ca             | Calcium      | 10.2                 | 0.1   |
| 15             | P              | Phosphorus   | 7.0                  | 0.0   |
| 8              | O              | Oxygen       | 69.0                 | 0.0   |
| 6              | C              | Carbon       | 4.4                  | 1.3   |
| 7              | N              | Nitrogen     | 6.4                  | 2.0   |
| 13             | Al             | Aluminium    | 0.6                  | 0.1   |
| 26             | Fe             | Iron         | 0.7                  | 0.5   |
| 14             | Si             | Silicon      | 0.3                  | 8.0   |
| 11             | Na             | Sodium       | 1.3                  | 0.7   |
